# Supplementary material for: Exploration of Tumor Mutation Burden Combined with Immune Infiltrates in the Prognosis of Lung Adenocarcinoma
Source: Research Square preprint supplement (doi:10.21203/rs.3.rs-219997/v1), 2021-02-23
Supplement: Supplementary file 1 [file 4520501c1bc2df13ba55e146.xls]

## Sheet: Sheet1
Gene	Low-TMB group	High-TMB group	logFC	P	FDR P
CD1C	5.74	2.559	-1.165	1.35e-18	4.87e-16
ROBO2	0.686	0.275	-1.319	1.94e-17	4.17e-15
CD1E	2.82	1.175	-1.263	3.8e-17	7.66e-15
CD1A	7.279	2.968	-1.294	2.54e-16	3.91e-14
RXRG	0.74	0.352	-1.073	4.99e-14	4.15e-12
SPINK5	10.675	3.871	-1.464	5.57e-14	4.57e-12
SCTR	8.991	4.143	-1.118	9.37e-13	5.54e-11
DMBT1	41.924	9.928	-2.078	9.06e-12	3.78e-10
CD1B	1.25	0.589	-1.087	1.81e-11	7.02e-10
RETN	5.414	2.13	-1.346	1.23e-08	2.05e-07
ELANE	0.743	0.283	-1.39	2.93e-08	4.4e-07
GDF10	1.805	0.837	-1.109	3.21e-08	4.75e-07
SCGB3A1	963.799	180.247	-2.419	4.21e-08	5.96e-07
SFTPA2	1782.17	791.621	-1.171	6.44e-08	8.61e-07
SFTPA1	1491.06	656.692	-1.183	7.25e-08	9.52e-07
SFTPD	221.512	101.277	-1.129	1.12e-07	1.38e-06
PGC	1090.47	417.431	-1.385	1.29e-07	1.57e-06
DUOX1	6.344	3.148	-1.011	2.7e-07	2.93e-06
LEFTY2	0.606	0.277	-1.128	4.96e-07	4.92e-06
FAM3D	5.996	1.485	-2.013	5.45e-07	5.31e-06
NDP	1.396	0.355	-1.974	8.86e-07	8.08e-06
PTGFR	1.292	0.471	-1.455	1.08e-05	6.92e-05
GLP2R	0.393	0.075	-2.394	1.3e-05	8.12e-05
DUOX2	2.625	0.657	-1.997	2.79e-05	0.0001571
VGF	0.872	4.431	2.346	3.04e-05	0.0001685
AGER	48.421	17.544	-1.465	3.47e-05	0.0001892
SERPIND1	10.721	3.893	-1.462	6.15e-05	0.0003102
KLRC2	0.228	0.475	1.059	9.3e-05	0.0004444
LEP	0.137	0.361	1.4	9.62e-05	0.0004579
IL17C	0.371	0.97	1.388	0.00012	0.0005557
CCR10	0.389	0.798	1.037	0.0001264	0.0005806
MIA	1.225	0.134	-3.196	0.0001348	0.0006116
INSL4	1.579	3.173	1.007	0.0001564	0.0006948
SLC10A2	0.849	0.374	-1.184	0.0005295	0.0019638
AZU1	0.751	0.25	-1.585	0.000556	0.0020474
NR1I2	0.346	0.113	-1.618	0.0012899	0.0041937
FABP4	5.499	2.173	-1.34	0.0013192	0.0042727
PI15	0.897	2.968	1.725	0.0036333	0.0100884
NR0B1	1.206	3.795	1.654	0.0039387	0.0107984
AVPR1A	0.504	1.056	1.067	0.0058054	0.0149844
MUC5AC	21.521	5.847	-1.88	0.0183481	0.0391592
AGTR2	3.776	1.35	-1.484	0.0206666	0.0432971
